# Supplementary material for: Transcriptional analysis reveals a markedly reduced expression of the voltage-dependent calcium channel α2δ1 subunit in canine prostate cancer compared to benign prostatic hyperplasia
Source: BMC Vet Res. 2025 Oct 9;21:593. doi: 10.1186/s12917-025-05046-7 (PMC12512813; doi:10.1186/s12917-025-05046-7)
Supplement: Supplementary file 1 — Additional File 1. Supplementary Figure 1. Scatter plot showing RNA integrity number and RNA concentration of the samples used in NanoString profiling. Supplementary Figure 2. Volcano plot showing 2923 DEGs in PC vs. BPH (-1>log2FC>1, FDR>0.05) out of 12185 identified genes. After additional filtering (mean normalized CPM >10 in each group), DEGs in green were selected for validation by targeted mRNA profiling (NanoString technology) based on the highest differences in expression and presence of mRNA in both samples (PC and BPH). For clarity, an enlarged section of the volcano plot shows the DEGs upregulated in PC. Supplementary Figure 3. A) Full-length blot presented in Fig.3A, and B) corresponding Stain-Free loading control. C) Blot replicate used together with A) for densitometric analysis presented in Fig. 3B. and D) corresponding Stain-Free loading control. [file 12917_2025_5046_MOESM1_ESM.xlsx]

## Sheet: Arkusz1
Supplementary Table S1. Results of RNA-Seq differential gene expression analysis for PC vs BPH group. These genes were selected based on a log2-fold change (log2FC) less than -2 or greater than 2, a false discovery rate (FDR) greater than 0.05, and a mean normalized counts per million (CPM) greater than 10 in both groups. List of the DEGs. The names of the genes selected for Nanostring validation…
							Normalized CPM - Benign Prostate Hyperplasia				Normalized CPM - prostate cancer
Gene name	ensembl_gene_id	log2FC	log2CPM	F	PValue	FDR	Dog 5 (BPH)	Dog 3 (BPH)	Dog 4 (BPH)	BPH mean	Dog 10	Dog 18	PC mean
CENPF	ENSCAFG00000012593	5.46874	8.4019	26.2383	8.85668e-05	0.000819232	44.3333	8	1.66667	18	1554	27	790.5
GLI1	ENSCAFG00000000223	5.04905	7.68175	44.7944	4.05924e-06	9.58562e-05	17.3333	15.6667	10.3333	14.4444	909	36	472.5
TOP2A	ENSCAFG00000016090	4.72237	8.22611	21.891	0.000223328	0.00160593	65	11.3333	2.66667	26.3333	1320	46.6667	683.333
ASPM	ENSCAFG00000011403	4.65753	7.42624	23.9899	0.00014105	0.00114733	37.6667	6.33333	3.33333	15.7778	757.333	22.3333	389.833
CHI3L1	ENSCAFG00000010274	4.48736	6.65363	16.1678	0.000908033	0.00454016	24.3333	6.66667	0	10.3333	6.66667	448.667	227.667
FBN2	ENSCAFG00000000681	3.93295	7.29494	27.221	7.28443e-05	0.000720461	40	10.6667	18.6667	23.1111	657.667	27.6667	342.667
TSPAN8	ENSCAFG00000000450	3.70448	6.44477	22.0915	0.000213497	0.00154941	19	22.6667	0.666667	14.1111	334	37.6667	185.833
SELP	ENSCAFG00000015180	3.68894	6.88619	30.0424	4.25907e-05	0.000498528	19.3333	36.3333	2.66667	19.4444	421.333	86.3333	253.833
RGS4	ENSCAFG00000029969	3.68392	6.16904	91.8519	3.25517e-08	2.98227e-06	12.3333	9.66667	14.6667	12.2222	220	84.6667	152.333
MSH6	ENSCAFG00000002664	3.59142	9.88254	34.1023	2.08153e-05	0.000308558	181.333	163	173	172.444	3868	204.333	2036.17
HELLS	ENSCAFG00000008090	3.58817	7.09214	28.1651	6.06323e-05	0.000642998	37	22.3333	14.3333	24.5556	554.667	26.6667	290.667
MSH2	ENSCAFG00000002659	3.56674	6.06539	29.1759	5.00384e-05	0.000557838	11.6667	9.33333	15.3333	12.1111	266.667	13	139.833
MATN2	ENSCAFG00000013852	3.524	7.56252	49.2685	2.2299e-06	6.05153e-05	48	42.3333	15.3333	35.2222	679.667	126.333	403
IGFBP5	ENSCAFG00000014474	3.51703	5.87003	24.347	0.000130769	0.00108102	15.3333	9.66667	7.66667	10.8889	234.667	8.33333	121.5
IGFBP2	ENSCAFG00000014490	3.43044	6.21657	20.3952	0.000315008	0.0020526	17.6667	22	3.66667	14.4444	293	16	154.5
CD302	ENSCAFG00000030080	3.42987	7.30323	46.0873	3.3988e-06	8.38574e-05	34.3333	32.3333	28	31.5556	600.667	65	332.833
SMOC2	ENSCAFG00000000868	3.4219	7.5018	44.4368	4.26646e-06	9.88394e-05	62.6667	18.3333	29	36.6667	627.667	136.333	382
MATN4	ENSCAFG00000009664	3.25789	5.92025	20.9294	0.000278131	0.00188384	5.66667	29.6667	2	12.4444	212	35.3333	123.667
ID1	ENSCAFG00000007045	3.16295	8.40086	54.8259	1.11986e-06	3.66683e-05	122.333	89.6667	25.6667	79.2222	925.333	477.333	701.333
CHAF1A	ENSCAFG00000019070	3.03262	6.10928	27.7158	6.61318e-05	0.000682317	22.3333	13	16.3333	17.2222	256	19.3333	137.667
COL6A3	ENSCAFG00000012226	2.98949	7.45878	30.1494	4.17606e-05	0.000493074	82	28.3333	26.3333	45.5556	598.667	113.667	356.167
NUP107	ENSCAFG00000000417	2.94959	5.82466	30.9465	3.61166e-05	0.000451219	15.6667	14.3333	14.3333	14.7778	204	19.3333	111.667
SULF2	ENSCAFG00000010874	2.94792	6.94473	26.4136	8.55025e-05	0.00079713	49	42	4.66667	31.8889	339	156.333	247.667
ATF3	ENSCAFG00000012339	2.94693	5.77562	11.8446	0.00316623	0.0120002	34	6.33333	2.66667	14.3333	8	210	109
SGO2	ENSCAFG00000011065	2.92059	8.05841	36.1726	1.4777e-05	0.000241688	85.3333	79.3333	52	72.2222	959.333	116.333	537.833
HHIP	ENSCAFG00000007557	2.89678	6.84241	23.5756	0.000154133	0.00123064	20.6667	47.3333	25.3333	31.1111	426.333	30.6667	228.5
PCOLCE	ENSCAFG00000014322	2.89612	6.53459	42.8357	5.35174e-06	0.00011501	49.3333	14.6667	11.6667	25.2222	245.333	123	184.167
PLXNC1	ENSCAFG00000006200	2.89381	6.94274	25.1722	0.000110072	0.000957334	64	31.6667	4.66667	33.4444	312.667	179.667	246.167
CDK4	ENSCAFG00000000280	2.86881	7.99173	30.7094	3.77005e-05	0.000462619	74	67.6667	71.6667	71.1111	933.333	85.3333	509.333
STMN1	ENSCAFG00000029191	2.83335	8.29882	37.0082	1.2919e-05	0.00021894	153	59	57.3333	89.7778	1044	213.333	628.667
VCAN	ENSCAFG00000008582	2.78783	6.18759	20.0559	0.000341265	0.00217485	35.3333	22.3333	4.66667	20.7778	249.667	34.3333	142
UBE2S	ENSCAFG00000029379	2.78161	5.7679	26.8972	7.76494e-05	0.000746181	23.6667	10.6667	12.3333	15.5556	185	25	105
FSCN1	ENSCAFG00000016010	2.70958	6.56237	41.6745	6.33278e-06	0.000129177	43.6667	30.6667	11	28.4444	239	128	183.5
GPNMB	ENSCAFG00000002753	2.69538	6.04962	8.99983	0.00814851	0.025271	57	2.66667	0.333333	20	52	205.333	128.667
SPP1	ENSCAFG00000009569	2.69347	6.32733	9.85643	0.00605456	0.0199434	39.6667	32	0.333333	24	36.3333	277.667	157
PEG3	ENSCAFG00000029153	2.69257	7.22917	18.1553	0.000542587	0.00310032	31.3333	43.6667	64	46.3333	554	29.3333	291.667
APOE	ENSCAFG00000004617	2.66645	6.20595	20.4475	0.000311168	0.00203792	35.3333	19.6667	13	22.6667	23.6667	262.667	143.167
	ENSCAFG00000016072	2.66637	5.1542	35.5134	1.64552e-05	0.000262443	13	9	10	10.6667	113.667	19.6667	66.6667
ATAD5	ENSCAFG00000018481	2.63683	7.02943	39.0206	9.42817e-06	0.000172755	56	37.6667	30	41.2222	426.333	78.6667	252.5
ADRA2A	ENSCAFG00000010840	2.63155	5.54136	32.0273	2.97812e-05	0.000391883	21.6667	16	4.33333	14	129.333	46	87.6667
CD2	ENSCAFG00000009829	2.62963	5.35891	14.2345	0.00154972	0.00685421	22.3333	14	1.33333	12.5556	22.6667	133.333	78
TET1	ENSCAFG00000013739	2.61452	5.56799	35.1879	1.73618e-05	0.000274034	16.3333	19	8.33333	14.5556	148.667	30	89.3333
G3BP1	ENSCAFG00000017841	2.61129	5.41115	48.6753	2.40838e-06	6.40744e-05	12	14.6667	13.3333	13.3333	28.3333	133	80.6667
HMGB3	ENSCAFG00000028715	2.61004	6.4319	17.1138	0.000707761	0.00376597	22.6667	33	26.3333	27.3333	315.333	14	164.667
NSG1	ENSCAFG00000015693	2.60913	5.81802	32.3553	2.81127e-05	0.000377261	23.3333	23.3333	6.33333	17.6667	161.667	51.6667	106.667
PTGS2	ENSCAFG00000013762	2.57516	6.3697	12.6812	0.00244748	0.00982258	60.3333	16.6667	3	26.6667	54.3333	262.333	158.333
EPSTI1	ENSCAFG00000044274	2.57442	6.08092	31.571	3.22899e-05	0.000415035	37	23.6667	4.66667	21.7778	155.667	101.667	128.667
CTSC	ENSCAFG00000004384	2.56718	5.73769	18.6011	0.000485504	0.00286206	29.3333	18.3333	3.66667	17.1111	44.6667	158.333	101.5
	ENSCAFG00000014478	2.53589	6.99544	11.1641	0.00392907	0.0141518	57	65.6667	3.66667	42.1111	62	428.333	245.167
KIF15	ENSCAFG00000014112	2.5265	5.63431	17.9448	0.000572122	0.00321406	24.3333	11.3333	13.3333	16.3333	172	12.3333	92.1667
BPI	ENSCAFG00000008901	2.51523	6.03691	13.8403	0.00173604	0.00749599	30.6667	32	2	21.5556	45	204	124.5
PAK3	ENSCAFG00000018154	2.46918	5.8486	38.3058	1.05299e-05	0.000187584	31.6667	19	7.33333	19.3333	150.667	64	107.333
BMP4	ENSCAFG00000014880	2.4646	7.95384	39.519	8.73647e-06	0.000163775	72	139.667	47.3333	86.3333	708.667	234.333	471.5
KIF20B	ENSCAFG00000007178	2.46218	8.01082	39.6499	8.56436e-06	0.000162549	117	82.3333	72.3333	90.5556	817.333	162.333	489.833
MMP14	ENSCAFG00000011197	2.46072	6.66081	52.0589	1.5668e-06	4.66785e-05	54.6667	32.3333	17.6667	34.8889	259	122	190.5
HMGB2	ENSCAFG00000007851	2.42742	9.02474	39.3014	9.03118e-06	0.000167496	234.667	197	128.667	186.778	1614.33	361.667	988
CENPE	ENSCAFG00000010836	2.42261	7.21463	25.2457	0.000108416	0.000949025	63	42.6667	54.3333	53.3333	500	56.6667	278.333
PIP4K2C	ENSCAFG00000000249	2.38669	6.18369	34.2499	2.03033e-05	0.000304376	27.6667	28	23	26.2222	227.667	39.6667	133.667
TUBB6	ENSCAFG00000018832	2.37635	6.30742	42.0327	6.01017e-06	0.000124973	40.3333	24.6667	21.3333	28.7778	212.333	79.6667	146
UACA	ENSCAFG00000017611	2.37408	7.56729	48.1324	2.58584e-06	6.74698e-05	68	76	64.6667	69.5556	576	133.333	354.667
COL11A1	ENSCAFG00000019985	2.37182	6.08283	15.0159	0.00124326	0.00574725	34.6667	17.6667	21.6667	24.6667	234.333	13.6667	124
TMEM255A	ENSCAFG00000018461	2.36809	5.08324	14.6503	0.00137721	0.00622504	13	20.6667	1.33333	11.6667	93	28.6667	60.8333
CENPW	ENSCAFG00000029836	2.36317	5.82611	25.9247	9.43589e-05	0.000857392	33.6667	14	13.6667	20.4444	172	34.6667	103.333
AURKA	ENSCAFG00000029331	2.35223	4.96751	19.0365	0.000436189	0.00263236	11	12.3333	9.66667	11	101.667	9	55.3333
	ENSCAFG00000049097	2.33599	4.89455	47.959	2.64556e-06	6.85874e-05	11.6667	15.3333	5	10.6667	64.3333	41.3333	52.8333
	ENSCAFG00000000814	2.31865	8.25004	8.69784	0.00907373	0.0275239	210	127.333	7.33333	114.889	182	955.333	568.667
SERPINH1	ENSCAFG00000005386	2.31368	7.00295	34.9045	1.81969e-05	0.000281589	76.6667	42	25.6667	48.1111	365.667	107.333	236.5
PTN	ENSCAFG00000003369	2.30386	5.6626	18.2369	0.000531588	0.00305289	17.3333	17.6667	22.6667	19.2222	162.333	19	90.6667
SEPTIN6	ENSCAFG00000018419	2.29572	5.71624	15.3131	0.00114508	0.00541645	34	22.3333	1.66667	19.3333	91	100	95.5
	ENSCAFG00000031706	2.27702	4.92817	40.5919	7.43195e-06	0.000145592	13.6667	7	14	11.5556	26.3333	81.6667	54
	ENSCAFG00000043319	2.26424	5.92734	29.6111	4.61296e-05	0.000527783	26	21.3333	22.3333	23.2222	185.667	33	109.333
LARP6	ENSCAFG00000017616	2.25335	5.79158	37.1677	1.25949e-05	0.000214042	25	27.6667	10	20.8889	150.667	48.6667	99.6667
CKAP2	ENSCAFG00000005898	2.24585	5.37906	27.6693	6.67317e-05	0.000685603	23.3333	10.3333	13.6667	15.7778	123.667	24	73.8333
NCKAP1L	ENSCAFG00000006413	2.24521	5.68975	9.54253	0.00674174	0.0217496	34	23.6667	1.33333	19.6667	26.6667	160	93.3333
CAPG	ENSCAFG00000007788	2.21413	5.72294	14.6268	0.00138638	0.00625669	37.6667	18.3333	5.66667	20.5556	37.6667	152	94.8333
SH3KBP1	ENSCAFG00000013075	2.20981	6.9283	35.061	1.77303e-05	0.000277334	67.6667	55.6667	21.6667	48.3333	296.333	146	221.167
S100A13	ENSCAFG00000017542	2.20444	5.17239	30.846	3.67791e-05	0.000456368	17	17.3333	7	13.7778	93.3333	32.6667	63
EDN1	ENSCAFG00000009794	2.2027	5.68351	10.4017	0.00504074	0.0172532	39.3333	17	4.33333	20.2222	21.6667	163	92.3333
IDO1	ENSCAFG00000005750	2.19861	5.12477	22.3402	0.000201967	0.0014915	18.3333	13.3333	9.33333	13.6667	22	101.667	61.8333
DLA-DMA	ENSCAFG00000000848	2.19819	5.3101	11.9821	0.00303328	0.0115827	24.6667	19.3333	1.66667	15.2222	26.3333	114.667	70.5
	ENSCAFG00000024817	2.18333	5.30375	12.0495	0.00297042	0.0114034	18	25.6667	2	15.2222	33.6667	106.667	70.1667
ZNF521	ENSCAFG00000018158	2.179	5.98837	29.0269	5.14604e-05	0.000568491	26.3333	39.6667	8.66667	24.8889	128	98.6667	113.333
MYO1B	ENSCAFG00000010080	2.17527	7.38247	24.3988	0.000129347	0.00107144	95.3333	87	20.6667	67.6667	415.667	187.667	301.667
CXCR4	ENSCAFG00000005109	2.16707	6.53436	13.9932	0.00166094	0.0072321	48.3333	56.3333	6.66667	37.1111	79	255.667	167.333
C30H15orf48	ENSCAFG00000031501	2.16629	6.44881	10.1356	0.00550935	0.0185395	48	53.6667	3	34.8889	136.667	177	156.833
	ENSCAFG00000048539	2.16347	5.12055	12.3374	0.00271792	0.0106317	15.6667	11.3333	14.3333	13.7778	114.333	5.66667	60
C4H1orf198	ENSCAFG00000011960	2.16252	5.28702	42.8897	5.31049e-06	0.000114528	16.3333	16	14.6667	15.6667	101.333	34	67.6667
TACC3	ENSCAFG00000015000	2.15608	5.95086	27.0881	7.47748e-05	0.000727873	33.6667	30	10.3333	24.6667	160.667	58.3333	109.5
DOCK2	ENSCAFG00000016982	2.14871	5.35364	26.4662	8.46067e-05	0.000790593	22.6667	19.6667	6.33333	16.2222	88.3333	54.3333	71.3333
KIF5A	ENSCAFG00000000238	2.14509	4.83632	18.7593	0.000466901	0.00277928	11.3333	10.6667	11.6667	11.2222	88	9.33333	48.6667
CLDN1	ENSCAFG00000029313	2.14292	5.31094	16.1983	0.000900657	0.00450884	30.3333	14	3.33333	15.8889	87.6667	51	69.3333
SELL	ENSCAFG00000015177	2.14197	6.38089	11.9698	0.00304491	0.0116126	62	34.6667	5	33.8889	103	195.667	149.333
APBB1IP	ENSCAFG00000004329	2.14049	5.50308	16.3843	0.000857121	0.00434128	34.6667	17	3	18.2222	74	85.3333	79.6667
ATAD2	ENSCAFG00000000992	2.13883	6.6417	23.1352	0.00016955	0.00132095	44	35.6667	44	41.2222	313.333	42.3333	177.833
MMP11	ENSCAFG00000014117	2.13763	5.58577	52.6767	1.45189e-06	4.42281e-05	26	18.6667	13.3333	19.3333	66.3333	103	84.6667
ODC1	ENSCAFG00000003415	2.13519	6.56535	28.2564	5.95793e-05	0.000634038	61	40.3333	16	39.1111	137.333	201.667	169.5
L1CAM	ENSCAFG00000019362	2.13271	5.23359	27.7318	6.59261e-05	0.000681927	17.3333	20.3333	7.33333	15	91	39.6667	65.3333
FANCB	ENSCAFG00000011861	2.13131	5.06061	30.5645	3.87071e-05	0.000469299	14.3333	15.6667	9.66667	13.2222	92.3333	22.3333	57.3333
	ENSCAFG00000014139	2.129	4.79879	9.02305	0.00808193	0.0250964	20.6667	11.6667	0.666667	11	14	81.6667	47.8333
SCN9A	ENSCAFG00000011438	2.11934	5.29162	27.1111	7.44371e-05	0.000727734	17.3333	16	15.3333	16.2222	93.6667	41.6667	67.6667
NCAPD2	ENSCAFG00000015124	2.11574	6.55791	25.7157	9.84553e-05	0.000885371	39	42.6667	36.3333	39.3333	289.333	44.6667	167
CEP135	ENSCAFG00000002189	2.10728	5.8678	61.3006	5.36029e-07	2.12357e-05	26.3333	26.3333	19.6667	24.1111	142	62.6667	102.333
PIEZO2	ENSCAFG00000018761	2.1039	5.80285	21.6315	0.000236819	0.00167284	26	35	7.33333	22.7778	146	50	98
CD3E	ENSCAFG00000012802	2.10151	5.11246	9.55862	0.00670445	0.0216522	19.3333	20.6667	1.66667	13.8889	18.6667	101.667	60.1667
SLC16A1	ENSCAFG00000013356	2.09066	4.79572	23.8486	0.000145365	0.00117458	11.3333	14	7.66667	11	75	19	47
VSIG4	ENSCAFG00000016623	2.08417	4.73588	8.42825	0.0100012	0.0296364	18.6667	13	0.333333	10.6667	13.6667	77.6667	45.6667
PTPRC	ENSCAFG00000011265	2.08401	6.69259	8.6495	0.00923264	0.0278948	74.3333	51.3333	5	43.5556	62	306	184
EFEMP2	ENSCAFG00000013195	2.08009	6.49121	37.4634	1.20179e-05	0.000206834	55.6667	33.3333	25.6667	38.2222	176.667	140.667	158.667
MSX1	ENSCAFG00000015705	2.07709	4.7654	36.7858	1.33865e-05	0.000225297	12.3333	15	5.33333	10.8889	40.6667	52	46.3333
DOCK10	ENSCAFG00000010292	2.07281	4.87804	17.5648	0.00063014	0.00347589	19.6667	13	2.66667	11.7778	33.3333	67.3333	50.3333
POLA1	ENSCAFG00000013521	2.07044	6.2133	41.8806	6.14489e-06	0.000126908	38.6667	30.6667	24.6667	31.3333	203.333	56.6667	130
LGALS1	ENSCAFG00000001487	2.06731	7.1939	22.845	0.000180653	0.00137407	103	47	39.6667	63.2222	123.667	397.667	260.667
DDIT3	ENSCAFG00000030112	2.06493	5.85052	21.3373	0.000253226	0.00175715	22.6667	21	30	24.5556	173.333	26.6667	100
TSFM	ENSCAFG00000000293	2.05664	7.8889	20.551	0.000303718	0.00200544	105.333	109	94.6667	103	749	91.3333	420.167
PTHLH	ENSCAFG00000010955	2.05635	5.12465	27.5671	6.80729e-05	0.000694116	18	8.33333	18	14.7778	89	29	59
SHMT2	ENSCAFG00000000195	2.04903	5.49088	25.2558	0.00010819	0.000948393	20.6667	19	17.6667	19.1111	130.333	24	77.1667
COL14A1	ENSCAFG00000000934	2.043	6.78578	18.0824	0.000552609	0.00313454	73.6667	57.3333	10.6667	47.2222	200	189.667	194.833
CLU	ENSCAFG00000008404	2.04212	9.91038	11.5574	0.00346573	0.0128554	766.333	376	126.333	422.889	484	2952	1718
DOCK11	ENSCAFG00000018332	2.04176	4.86377	13.3574	0.00199946	0.00838383	18.3333	15.3333	2.33333	12	27	72	49.5
	ENSCAFG00000014028	2.02371	5.57775	26.1182	9.07358e-05	0.000832372	33	15.3333	13.3333	20.5556	102	62	82
NR5A2	ENSCAFG00000011176	2.02226	4.79029	27.6526	6.69498e-05	0.000686686	9	17.3333	7.66667	11.3333	65.3333	27.6667	46.5
EZH2	ENSCAFG00000003411	2.01502	6.87036	39.6018	8.62717e-06	0.000163233	58.6667	56.6667	39	51.4444	315.667	93.3333	204.5
ANKRD6	ENSCAFG00000003105	2.01344	4.91743	33.4689	2.31824e-05	0.00032991	13	19	6	12.6667	54	48.3333	51.1667
COL8A2	ENSCAFG00000032454	2.00055	5.02237	13.7961	0.00175845	0.00756052	19	6	17.3333	14.1111	87.3333	21	54.1667
ALDH7A1	ENSCAFG00000000588	-2.00457	7.35964	79.1919	9.29903e-08	6.13152e-06	216	195	286	232.333	37.6667	76.3333	57
CCDC125	ENSCAFG00000007760	-2.01018	4.935	92.4253	3.11328e-08	2.89583e-06	35	46.3333	45.3333	42.2222	11.3333	9	10.1667
ARHGAP28	ENSCAFG00000018591	-2.01075	5.10471	80.772	8.09684e-08	5.63222e-06	39.3333	53.6667	49.3333	47.4444	14.3333	8.66667	11.5
GOLGA4	ENSCAFG00000004806	-2.024	11.6549	301.876	3.73413e-12	4.13639e-09	4310	4361.67	5101.67	4591.11	1032.67	1181.33	1107
DOCK4	ENSCAFG00000003307	-2.02455	5.31638	27.1004	7.45943e-05	0.000727734	44.6667	68.3333	52.6667	55.2222	5	22	13.5
STXBP5	ENSCAFG00000000353	-2.03654	6.32438	93.7298	2.81558e-08	2.72285e-06	101.667	114	122	112.556	18.3333	35.6667	27
MYO6	ENSCAFG00000002741	-2.04578	9.73656	108.473	9.76267e-09	1.25091e-06	1057.67	1174.67	1415	1215.78	203	375.333	289.167
DHRS7	ENSCAFG00000015598	-2.0459	9.80986	57.8514	7.87278e-07	2.84658e-05	1241	1105	1495.67	1280.56	170.333	439	304.667
TTLL7	ENSCAFG00000020321	-2.04634	6.51704	113.127	7.1721e-09	9.71023e-07	107.667	130.667	149.333	129.222	23	38.3333	30.6667
GCAT	ENSCAFG00000001456	-2.05123	5.42211	30.7797	3.72232e-05	0.000459074	60.6667	44.3333	75	60	6	22.3333	14.1667
	ENSCAFG00000046266	-2.05175	5.67282	38.5202	1.0185e-05	0.000183433	38	68.3333	109.333	71.8889	20.3333	13.3333	16.8333
CES5A	ENSCAFG00000009316	-2.064	5.93878	12.551	0.00254612	0.0101502	96	43	121	86.6667	3.66667	37.6667	20.6667
STAP2	ENSCAFG00000019095	-2.06521	5.10064	15.1875	0.00118546	0.00556213	48.6667	36.6667	57.6667	47.6667	1.66667	21.3333	11.5
PRKACB	ENSCAFG00000020319	-2.0658	5.58502	73.4205	1.57355e-07	8.64277e-06	47.3333	63.6667	91.3333	67.4444	13.6667	17.6667	15.6667
ANXA9	ENSCAFG00000012309	-2.06689	5.09898	48.8295	2.36051e-06	6.32149e-05	48	47.6667	46.6667	47.4444	5.33333	17.3333	11.3333
SELENBP1	ENSCAFG00000012675	-2.06796	6.42447	24.0926	0.000138004	0.00112527	123.333	78.6667	164	122	9.33333	48	28.6667
ATP1B1	ENSCAFG00000015258	-2.08565	9.95654	85.0218	5.64146e-08	4.29632e-06	1182.33	1417	1667.67	1422.33	208.333	449.333	328.833
HIPK2	ENSCAFG00000004038	-2.08686	8.5433	85.3252	5.501e-08	4.24239e-06	423	597	579.333	533.111	84	163	123.5
U3	ENSCAFG00000022297	-2.12158	7.74118	37.24	1.24509e-05	0.000212484	271.333	370.333	276.333	306	103.333	34	68.6667
CGN	ENSCAFG00000012729	-2.13573	6.09912	45.5464	3.65921e-06	8.81175e-05	89.3333	74.3333	128.667	97.4444	11	33	22
SLC16A7	ENSCAFG00000000316	-2.14062	6.46567	205.027	7.87316e-11	4.17106e-08	119.667	122.667	135.333	125.889	24.6667	31.3333	28
CRACR2B	ENSCAFG00000009553	-2.14114	5.22505	42.7679	5.40409e-06	0.000115727	36	52	69	52.3333	6	17.3333	11.6667
NDRG2	ENSCAFG00000005461	-2.14808	7.13912	34.9654	1.80135e-05	0.000279255	153	190	262.667	201.889	19	71	45
GAL3ST2	ENSCAFG00000013175	-2.14832	5.92803	22.2126	0.000207796	0.0015198	116	86.6667	56	86.2222	6	32.3333	19.1667
CDKL2	ENSCAFG00000008344	-2.16847	6.20748	183.484	1.86162e-10	7.56127e-08	89.6667	110.667	115.333	105.222	20.6667	25.3333	23
NIPAL3	ENSCAFG00000012956	-2.1719	6.95106	61.2656	5.38074e-07	2.12357e-05	126.667	166.667	238.667	177.333	24	53.3333	38.6667
EHF	ENSCAFG00000031582	-2.17262	5.63762	17.0014	0.000728729	0.00386236	53.3333	74	83.6667	70.3333	2.33333	28.6667	15.5
LTF	ENSCAFG00000013763	-2.17296	6.76268	12.1525	0.0028772	0.0111361	319.667	85	61.3333	155.333	36	31.3333	33.6667
U2	ENSCAFG00000048225	-2.18931	6.66439	44.6952	4.11559e-06	9.66252e-05	181.333	76.6667	180	146	26.6667	35.3333	31
	ENSCAFG00000040846	-2.20189	5.94929	64.9536	3.63394e-07	1.62196e-05	108.667	59.3333	97.6667	88.5556	15.3333	22	18.6667
	ENSCAFG00000041016	-2.2102	5.33822	14.3512	0.00149897	0.00666603	78.3333	39	54	57.1111	2	22.6667	12.3333
ATP1A1	ENSCAFG00000009795	-2.22627	6.62866	89.1753	4.02071e-08	3.48333e-06	100	176.333	150.667	142.333	27.3333	32.3333	29.8333
FAM3C	ENSCAFG00000003501	-2.25901	6.78035	188.786	1.49376e-10	7.00055e-08	173	123	180.333	158.778	28	37	32.5
NUCB2	ENSCAFG00000008713	-2.26519	11.0839	103.063	1.41803e-08	1.66714e-06	2658	2953.33	3867	3159.44	418.333	871.667	645
CROT	ENSCAFG00000001827	-2.26633	7.06224	93.4362	2.87971e-08	2.76293e-06	193.333	173.333	213	193.222	25.6667	53.3333	39.5
DMXL2	ENSCAFG00000015444	-2.28057	6.12285	95.1257	2.53182e-08	2.52871e-06	75	88.6667	138.333	100.667	20.3333	20	20.1667
PRKAR2B	ENSCAFG00000003952	-2.28704	7.69111	67.5803	2.77759e-07	1.29674e-05	289.667	258.333	352.667	300.222	31.6667	89.3333	60.5
IDNK	ENSCAFG00000029948	-2.29816	5.55677	128.437	2.79905e-09	5.31183e-07	82.6667	66.6667	52	67.1111	10.3333	16.6667	13.5
REPS2	ENSCAFG00000012774	-2.30569	5.54327	107.587	1.03664e-08	1.2759e-06	53	65	82.3333	66.7778	11	15.6667	13.3333
	ENSCAFG00000031337	-2.31003	6.0087	9.58823	0.00663643	0.0214781	54	211.333	8	91.1111	14	22.6667	18.3333
EXPH5	ENSCAFG00000014332	-2.347	6.80424	55.1189	1.08157e-06	3.591e-05	122	204	160	162	15.6667	48	31.8333
PAM	ENSCAFG00000007593	-2.34926	6.76077	88.0594	4.39781e-08	3.67036e-06	180.667	133	158.667	157.444	19.3333	42	30.6667
MME	ENSCAFG00000008711	-2.34986	8.88003	29.4007	4.79745e-05	0.000541267	619.667	625.333	823.333	689.444	39.6667	226.333	133
U2	ENSCAFG00000029182	-2.35775	5.73711	17.0068	0.000727718	0.00386036	108	30.3333	94	77.4444	12	16.6667	14.3333
ATP6V1B2	ENSCAFG00000010095	-2.36241	6.66796	36.1226	1.48974e-05	0.000243005	128	234.333	79	147.111	16.6667	40.3333	28.5
RHPN2	ENSCAFG00000007465	-2.37335	7.10432	127.964	2.87715e-09	5.31183e-07	171.667	179	252.667	201.111	30.6667	45.6667	38.1667
PLD1	ENSCAFG00000015246	-2.38431	6.18532	78.59	9.80845e-08	6.22962e-06	98	100	118.667	105.556	11	29	20
	ENSCAFG00000004223	-2.41677	6.9353	73.4132	1.57464e-07	8.64277e-06	160.333	158.667	217.333	178.778	17.6667	48.3333	33
ECHDC2	ENSCAFG00000042412	-2.42243	5.96092	40.1629	7.9254e-06	0.000152802	95.3333	46	131.333	90.8889	9	24.3333	16.6667
	ENSCAFG00000046525	-2.42584	6.26378	125.103	3.40546e-09	6.01384e-07	82.6667	127.333	126.333	112.111	23	17.3333	20.1667
SLC39A10	ENSCAFG00000010142	-2.4444	10.4413	93.2263	2.92653e-08	2.78592e-06	1555.67	2002	2603	2053.56	500.667	237	368.833
DZIP1	ENSCAFG00000005465	-2.44535	8.67286	199.342	9.79731e-11	4.97418e-08	579.333	722.333	499	600.222	91.6667	124.667	108.167
ANK3	ENSCAFG00000012694	-2.47448	8.26707	170.452	3.28183e-10	1.21179e-07	375	451.333	537.333	454.556	62.3333	98.3333	80.3333
RNF128	ENSCAFG00000017931	-2.47459	6.53256	80.2681	8.46018e-08	5.7462e-06	117.667	116	174	135.889	14	34.3333	24.1667
ACSL5	ENSCAFG00000010928	-2.49031	6.82865	51.5489	1.66935e-06	4.85467e-05	121.333	199	179.667	166.667	14.6667	44.6667	29.6667
	ENSCAFG00000041421	-2.49235	7.58346	12.0209	0.00299689	0.011487	241	363	244.667	282.889	90	7	48.5
TSTD1	ENSCAFG00000012683	-2.51323	7.66359	113.269	7.10629e-09	9.71023e-07	269	256	375.333	300.111	63.6667	38.6667	51.1667
PHKA2	ENSCAFG00000012925	-2.51763	6.3134	124.743	3.47924e-09	6.05637e-07	88	115.667	147.333	117	22.3333	17	19.6667
ENPP5	ENSCAFG00000002021	-2.52255	5.82144	113.346	7.0708e-09	9.71023e-07	75	66.3333	107.333	82.8889	15.6667	12.3333	14
SERHL2	ENSCAFG00000000970	-2.52392	6.90259	81.7361	7.44936e-08	5.35568e-06	183.667	132.667	213.333	176.556	17.3333	43.3333	30.3333
ITPR1	ENSCAFG00000023463	-2.54592	6.74517	120.474	4.50638e-09	7.1312e-07	128.667	155.333	191	158.333	18.6667	34.3333	26.5
MIPOL1	ENSCAFG00000013731	-2.55653	7.65313	149.047	9.1339e-10	2.48557e-07	210.333	399.333	283.667	297.778	51.3333	48	49.6667
PGR	ENSCAFG00000003978	-2.55762	5.34349	54.9719	1.1006e-06	3.61924e-05	57	49.3333	70.3333	58.8889	4.66667	15.6667	10.1667
KLF15	ENSCAFG00000003807	-2.55924	6.41698	28.8009	5.3705e-05	0.000586376	87	88	204.333	126.444	7	35.3333	21.1667
SYTL3	ENSCAFG00000000659	-2.56553	5.87246	35.9028	1.54394e-05	0.000249066	73	80.3333	104.667	86	4.33333	24.3333	14.3333
ABCC4	ENSCAFG00000005433	-2.56722	5.7142	78.7664	9.656e-08	6.20569e-06	64	61	106.333	77.1111	8.33333	17.3333	12.8333
TMEM229A	ENSCAFG00000001762	-2.56958	5.90212	43.1914	5.08622e-06	0.000111467	45.6667	148	68.3333	87.3333	12.3333	17	14.6667
ELL2	ENSCAFG00000007900	-2.58752	6.1422	155.116	6.74543e-10	1.99996e-07	88.6667	92.3333	131.667	104.222	13.3333	20.3333	16.8333
SVIP	ENSCAFG00000048561	-2.6231	6.92893	82.9713	6.70286e-08	4.89068e-06	169.667	158.333	215.667	181.222	16.3333	41.6667	29
SNORD39	ENSCAFG00000029523	-2.62743	6.18381	88.8418	4.12945e-08	3.5187e-06	87	92	144	107.667	10.3333	24	17.1667
ACOT6	ENSCAFG00000023467	-2.66264	6.69261	72.7891	1.6702e-07	8.94561e-06	89	161.667	212.333	154.333	31.3333	16	23.6667
MAN1A1	ENSCAFG00000000945	-2.66874	8.05136	49.4568	2.1764e-06	5.94606e-05	353.333	475	360	396.111	24.3333	98.6667	61.5
PLCB4	ENSCAFG00000005760	-2.69027	6.04686	153.146	7.43366e-10	2.10649e-07	87.3333	102.667	104.667	98.2222	13.6667	15.6667	14.6667
GGT6	ENSCAFG00000015282	-2.69533	5.87237	59.6445	6.43259e-07	2.44941e-05	83.3333	66.6667	110.667	86.8889	6	20.3333	13.1667
KRT18	ENSCAFG00000007154	-2.74494	9.34523	74.6617	1.40128e-07	7.97881e-06	894	936	1106.67	978.889	67.3333	219.667	143.5
U2	ENSCAFG00000029818	-2.86469	5.75782	19.0884	0.0004307	0.00261098	110	39.6667	93.3333	81	4.33333	17	10.6667
MT2A	ENSCAFG00000023759	-2.88719	10.967	59.5336	6.51254e-07	2.47213e-05	2612	4385.33	2109	3035.44	199.667	608.667	404.167
ICA1	ENSCAFG00000002257	-2.9682	7.39353	233.751	2.82444e-11	2.02446e-08	257.667	192.667	317	255.778	29.6667	34	31.8333
ARFGEF3	ENSCAFG00000000272	-2.98328	6.40067	280.318	6.73029e-12	6.30835e-09	109.667	133.667	140	127.778	15	17	16
TBC1D16	ENSCAFG00000005578	-3.04847	7.94501	121.312	4.28053e-09	6.98891e-07	275.667	335	522	377.556	57	31.6667	44.3333
PPM1H	ENSCAFG00000000337	-3.08939	7.17376	71.2945	1.92659e-07	9.90525e-06	185	212.667	264	220.556	11.3333	40.3333	25.8333
CENPV	ENSCAFG00000018019	-3.13717	8.33163	119.107	4.90385e-09	7.6607e-07	260.667	548.667	677	495.444	55.6667	54.6667	55.1667
ALCAM	ENSCAFG00000009721	-3.15961	11.9039	339.572	1.45862e-12	2.53904e-09	5167.33	5919	6645	5910.44	765.667	530.667	648.167
ZBTB16	ENSCAFG00000013538	-3.19739	7.36448	25.6546	9.96906e-05	0.000892037	206	233	320.333	253.111	2.66667	52.6667	27.6667
SDR16C5	ENSCAFG00000007060	-3.20762	6.63822	73.8099	1.51707e-07	8.51868e-06	155	110.333	194	153.111	7.66667	25.3333	16.5
SPP2	ENSCAFG00000011984	-3.26533	6.72537	32.3645	2.80675e-05	0.000377069	237.667	136.667	112	162.111	3	31.6667	17.3333
SERPINB6	ENSCAFG00000025512	-3.46816	7.38848	80.1536	8.54529e-08	5.75273e-06	226	235	322	261	10.3333	36	23.1667
	ENSCAFG00000021068	-3.68681	7.97794	30.9814	3.58901e-05	0.000449919	371.667	130	691	397.556	7	54.6667	30.8333
EDIL3	ENSCAFG00000008467	-3.73484	7.68082	114.324	6.63746e-09	9.515e-07	289	310.667	369.333	323	36.3333	10.6667	23.5
	ENSCAFG00000028434	-3.75582	7.79972	78.2084	1.01476e-07	6.34096e-06	291	231.333	533.667	352	11	40	25.5
	ENSCAFG00000009113	-4.18574	11.3516	140.053	1.46198e-09	3.49298e-07	3760.67	5671	3076.33	4169.33	122.667	328.333	225.5
UBR7	ENSCAFG00000017591	-4.2192	8.20918	295.459	4.4308e-12	4.49911e-09	336.667	521.333	559.333	472.444	28.3333	21.3333	24.8333
GADD45G	ENSCAFG00000002174	-4.26146	7.48352	67.799	2.71719e-07	1.27834e-05	248	219.667	391.333	286.333	3.66667	25.3333	14.5
	ENSCAFG00000038832	-4.42704	9.65579	126.583	3.11969e-09	5.67364e-07	1229	959	1704.67	1297.56	91	26	58.5
AZGP1	ENSCAFG00000014889	-4.53153	8.3657	103.014	1.42292e-08	1.66714e-06	534	299.667	760	531.222	9.33333	36	22.6667
SLC12A2	ENSCAFG00000000637	-4.63798	10.0302	215.651	5.30975e-11	3.08092e-08	1223	1855	1985	1687.67	39.6667	94	66.8333
RDH16	ENSCAFG00000000148	-4.83203	7.63994	208.153	6.99783e-11	3.87584e-08	251.333	287.333	429	322.556	15.3333	6.33333	10.8333
SLC1A1	ENSCAFG00000002067	-5.06046	9.15556	395.068	4.32175e-13	1.05321e-09	809.333	797.667	1173.33	926.778	31	23.3333	27.1667
CACNA2D1	ENSCAFG00000006339	-5.4052	9.97428	685.828	4.86856e-15	5.93235e-11	1399	1502.67	2021	1640.89	32	43.6667	37.8333
CLDN10	ENSCAFG00000005458	-5.45424	9.70166	225.301	3.77008e-11	2.41781e-08	1186.67	1509	1376.67	1357.44	15	46.6667	30.8333
NKX3-1	ENSCAFG00000009107	-6.15812	9.19141	407.727	3.35103e-13	1.05321e-09	986.333	1168.67	714.667	956.556	10	16.6667	13.3333
KLK2	ENSCAFG00000002907	-6.39561	15.1493	95.9027	2.38784e-08	2.44503e-06	52418	53407.7	73593	59806.2	265	1130	697.5
ATP6V0A4	ENSCAFG00000004236	-6.73137	9.3627	305.189	3.42304e-12	4.13639e-09	876	818	1562	1085.33	7	13.6667	10.3333
